1 **Traditional Healers as Client Advocates in the HIV-endemic Region of**  
2 **Maputo, Mozambique: Results from a qualitative study**

3

4 Radhika Sundararajan<sup>1,2</sup>, Patricio V. Langa<sup>3</sup>, Trisha Morshed<sup>4</sup>, Sandra Manuel<sup>5</sup>

5 *1. Department of Emergency Medicine, Weill Cornell Medicine, New York, USA.*

6 *2. Weill Cornell Center for Global Health, New York, USA*

7 *3. Faculty of Education, Universidade Eduardo Mondlane, Maputo City, Mozambique.*

8 *4. Department of Emergency Medicine, University of California San Diego, San Diego, USA.*

9 *5. Faculty of Education, Universidade Eduardo Mondlane, Maputo City, Mozambique.*

10 Corresponding author: Dr. Radhika Sundararajan, Weill Cornell Medicine, Department of  
11 Emergency Medicine, 525 East 68<sup>th</sup> Street, New York NY 10065; ras9199@med.cornell.edu

12

13 Radhika Sundararajan, M.D. Ph.D. is an Assistant Professor in the Weill Cornell Department of  
14 Emergency Medicine and in the Weill Cornell Centre for Global Health in New York City, USA.

15

16

17

18

19

20

21

22

23

# 1 **Traditional Healers as Client Advocates in the HIV-endemic Region of** 2 **Maputo, Mozambique: Results from a qualitative study**

3 Traditional healers are commonly utilized throughout sub-Saharan Africa instead of – and  
4 in concert with – biomedical facilities. Traditional healers are trusted providers and  
5 prominent community members, and could be important partners in improving engagement  
6 with HIV services in endemic contexts. Our study sought to understand the roles of healers  
7 in the urban setting of Maputo, Mozambique, where HIV prevalence is high and testing  
8 rates are low. Qualitative data were gathered through minimally-structured interviews with  
9 36 healers. Analysis followed an inductive, grounded theory approach. Data reveal three  
10 themes relevant to improving engagement with HIV services in this endemic region: 1)  
11 healers have positive attitudes towards biomedicine; 2) healers advocate for their sick  
12 clients; and 3) clients are reticent to present to biomedical facilities. Healers describe their  
13 roles as ‘cooperative’ with biomedical providers to provide healthcare for their clients.  
14 Results suggest that healers could be considered *critical enablers* to effective HIV  
15 programs in communities. They have social and symbolic capital that positions them to  
16 beneficially influence clients, and are natural partners for interventions to improve uptake  
17 of HIV services.

18  
19 Keywords: Traditional Healers, Mozambique, social capital, qualitative

## 20 **Introduction:**

21 Throughout sub-Saharan Africa, traditional healers play a central role in communities; the WHO  
22 estimates that 80% of the general population of sub-Saharan Africa utilizes these practitioners  
23 (World Health Organization, 2002). In Mozambique specifically, they play an even more crucial  
24 role in managing health complaints. With independence in 1975 came a massive exodus of  
25 Mozambique’s physicians, many of whom were under contract with the Portuguese colonial  
26 government. Much of the country’s health infrastructure was additionally decimated by a  
27 subsequent 16 year-long civil war. Now, Mozambique faces a dearth of physicians, with only 5  
28 for every 100,000 people (World Health Organization, 2006), among the lowest densities of

1 physicians in the world. Healthcare facilities and healthcare workers are also sparsely distributed  
2 around the country, with less than 50% of the population having regular access to health services  
3 (Global Health Workers Alliance, 2013); people must travel long distances to access health care  
4 at biomedical facilities. There are no official statistics describing the number of traditional  
5 healers in the country, but they are unofficially estimated at >80,000 (Green, 1999). The study  
6 site of Maputo is the nation's capital, a city of ~1.7 million people, home to the nation's largest  
7 hospital (Maputo Central Hospital), and region of Mozambique with the greatest coverage of  
8 healthcare facilities (Anjos Luis & Cabral, 2016). However, Maputo is home to a large number  
9 of healers, demonstrating that their importance is not limited to contexts with low density of  
10 biomedical facilities.

11       Ethnographic and community-based research from sub-Saharan Africa suggests that  
12 healers may be favored over biomedical practitioners because they are considered custodians of  
13 indigenous knowledge, and commonly hold positions of authority in their communities (Homsy,  
14 King, Balaba, & Kabatesi, 2004). As such, their evaluations and recommendations could have  
15 cultural appropriateness that biomedicine may not, considering factors outside of biomedical  
16 physiology that may contribute to symptoms, such as ancestral unrest, family conflicts, or social  
17 transgressions (Green, 1999; Green, Zokwe, & Dupree, 1995). Prior research has also  
18 demonstrated that healers are often preferred due to lack of trust in biomedical providers (Homsy  
19 et al., 2004; King & Homsy, 1997), and prior negative experiences at healthcare facilities  
20 (Morris, 2001; Sundararajan, Kalkonde, Gokhale, Greenough, & Bang, 2013), including “stock  
21 outs” of medications, malfunctioning machines, long wait times to access service, and perceived  
22 breaches of confidentiality by biomedical providers.

1 Utilization of traditional healers is particularly relevant to the Human immunodeficiency  
2 virus [HIV] epidemic Mozambique. In 2014, Mozambique was noted to have the 3<sup>rd</sup> highest rate  
3 of AIDS-related deaths in sub-Saharan Africa, behind Nigeria and South Africa (UNAIDS,  
4 2014a). The most recent national survey estimates HIV prevalence among sexually active adults  
5 at 10.5%, with 1.5 million people living with HIV/AIDS. In Maputo, prevalence is much higher  
6 (16.8%), and is where 9% of all Mozambicans living with HIV reside (PEPFAR, n.d.). Despite  
7 this, lifetime HIV testing rates in Mozambique are very low (37% for women, and 19% for  
8 men)(Health, 2010). The country’s long civil war has also impacted the current population-level  
9 skew that is particularly relevant to the HIV epidemic: 51% of the current population is of  
10 sexually active age (Global Health Workers Alliance, 2013). Studies throughout sub-Saharan  
11 African have demonstrated that traditional medicine is frequently utilized by HIV-infected  
12 patients, both prior to and following diagnosis (Hughes et al., 2012; Moshabela, Pronyk,  
13 Williams, Schneider, & Lurie, 2011; Wanyama et al., 2017). Prior research in Mozambique has  
14 demonstrated that healer utilization is associated with delays in HIV diagnosis (Audet et al.,  
15 2014), though there are no data for urban centers where biomedicine is readily accessible.

16 Mozambican healers work as spiritualists (*Nhamussoro*), herbalists (*Nhangarume*), or  
17 birth attendants. Spiritual healers claim the ability to identify and remove curses, or address  
18 ancestral unrest through rituals or incantations. In addition to this specialization, they also utilize  
19 herbs to heal (via ingestion, “bath”, or “vaccination” where herbs are rubbed into a small incision  
20 made in the skin). While spiritual healers use herbs in their treatments, herbalists deal  
21 exclusively with herbal remedies. Birth attendants provide prenatal and obstetrical care to  
22 women, and employ ‘traditional’ methods for birthing outside of biomedical facilities.  
23 Traditional healer services are formally endorsed by the Ministry of Health, and are largely

1 overseen by the Association of Traditional Healers [Associação dos Médicos Tradicionais de  
2 Moçambique, AMETRAMO]. AMETRAMO-affiliated practitioners have standardized  
3 treatments and fees for service, and attend periodic training sessions, in cooperation with the  
4 Ministry.

5 Little is known about healers' practices in urban settings, engagement with biomedical  
6 structures, and HIV-relevant practices. This qualitative study addresses this gap in knowledge by  
7 1) considering content and sources of HIV-related knowledge among traditional healers in  
8 Maputo City; 2) characterizing healer attitudes towards biomedicine; and 3) describing actions  
9 taken by healers when caring for a client they suspect to be HIV-infected.

10

## 11 **Materials and Methods:**

12 ***Study Design:*** We enrolled 36 traditional healers practicing throughout Maputo City District  
13 between April and November 2016 [Figure 1]. A qualitative study design was employed, with  
14 semi-structured interviews to elucidate current practices and beliefs about HIV, and interfaces  
15 with biomedicine. An interview guide was created in English, translated into Portuguese and the  
16 local language (*Changana*), and back-translated into English to verify preservation of meanings.  
17 All participants provided socio-demographic information, including practice specialty, years of  
18 practice, highest level of education, client volume, and income. The interview guide was piloted  
19 with two traditional healers in March 2016, whose responses are not included in this analysis.

20 ***Participant Recruitment and Sampling:*** During recruitment, research assistants introduced  
21 themselves and the study as affiliated with the local university; care was taken not to represent  
22 the study or its staff as representatives of hospitals or clinics. Approximately half of our  
23 participants (N=15) were recruited in cooperation with AMETRAMO. The remaining

1 participants (N=21) were recruited with assistance from healers and community members, to  
2 avoid including only healers who were supportive of the AMETRAMO organization.

3 We employed a purposive sampling strategy to identify “information rich” cases to  
4 maximize the quality of our qualitative data: potential participants having knowledge and  
5 experience with our topics of interest (Palinkas et al., 2015). Sample size of N=36 was guided by  
6 the concept of qualitative *data saturation* where interviews no longer reveal substantially new or  
7 relevant content, and categories are sufficiently developed based on completed interviews  
8 (Corbin & Strauss, 2014). Transcripts were analyzed throughout the data collection period;  
9 iterative engagement with the dataset allowed timely communication among the research team to  
10 direct interviews ensuring emerging themes could be explored and well developed.

11 **Data Collection:** Healers were eligible for participation if they were 1) 18 year of age or older;  
12 2) recognized by the community as a practitioner of traditional medicine; and 3) able to provide  
13 informed consent in Portuguese or Changana. Semi-structured interviews lasted approximately 1  
14 hour, and were conducted by four Mozambican research assistants (two female, two male) with  
15 educational backgrounds in behavioral science, and fluent in English, Portuguese and Changana.  
16 Research assistants used an interview guide to ensure that the following core topics were  
17 discussed consistently: 1) HIV knowledge (symptoms, modes of transmission, risk factors, and  
18 diagnosis/treatment/cure) and sources of knowledge; 2) prior experiences and attitudes towards  
19 biomedicine; and 3) current traditional treatments provided to clients. Research assistants were  
20 also encouraged to explore novel or interesting topics that arose in the course of the interview.

21 **Data Management and Analysis:** Interviews were transcribed by the interviewer into Portuguese  
22 (translated if the interview was conducted in *Changana*), and then translated into English. One  
23 author (PVL) ensured validity of Changana, Portuguese and English translations through random

1 spot-checking, as well as targeted review of transcripts (when English translation was unclear or  
2 confusing, for example), against interview audio. Two authors (RS and TM) reviewed all  
3 English transcripts for content relevant to HIV-related knowledge and practices among  
4 traditional healers, within 1 week of interview completion. The first author analyzed interview  
5 data using an iterative, inductive, grounded theory approach (Corbin & Strauss, 2014). Through  
6 open coding, preliminary categories were formed. These categories were reviewed, sharpened,  
7 refined through data triangulation, and grouped, with generation of a final set of codes. At the  
8 completion of data collection, all transcripts were re-reviewed applying the final set of codes to  
9 identify major themes illustrating HIV-related knowledge and practices among healers in  
10 Maputo, Mozambique. Example(s) from our dataset are presented in the results section that best  
11 illustrate these themes. NVIVO 10.0 (QSR International) was used for qualitative data  
12 management, but not in the creation of codes. Demographic characteristics of participants are  
13 summarized with basic descriptive statistics.

14 ***Ethical Considerations:*** This research was approved by the Institutional Review Board of the  
15 University of California, San Diego (Protocol #150062) and the Biomedical Ethics Committee of  
16 the Universidade Eduardo Mondlane Faculty of Medicine. All participants were volunteers, and  
17 provided with informed consent, both written and reviewed verbally to ensure comprehension  
18 among those participants with limited literacy. Healers were remunerated with 1000 Meticais  
19 (~\$15 USD) as compensation for time lost to revenue generation. This remuneration rate was set  
20 by AMETRAMO, and is the standard rate for members participating in research studies. The  
21 same remuneration was extended to non-AMETRAMO participants in the interest of equity. All  
22 audio and data files were stored in password protected electronic files, accessible only to study  
23 staff.

1  
2  
3  
4  
5  
6  
7  
8  
9  
10  
11  
12  
13  
14  
15  
16  
17  
18  
19  
20  
21  
22  
23

**Results:**

*Characteristics of participants:* Table 1 shows characteristics of our participants. In our sample, the vast majority self-identified as spiritual healers (N=34, 94%) and two identified as purely herbalists. There were no birth attendants in our sample, potentially due to proximity of biomedical facilities for prenatal/obstetrical services. All 36 healers approached for enrollment agreed to participate in the study. Consistent with other research involving healers in Mozambique and South Africa, our participants are largely female (67%).

*Interview Themes:* We note three major themes within our interviews that are relevant to understanding the roles of traditional healers in this highly HIV-endemic context: 1) praise for biomedicine; 2) advocacy for sick clients; and 3) client reticence for biomedical testing.

*Praise for Biomedicine:* Among our sample, healers report uniformly high praise for biomedicine and biomedical providers. Participants describe biomedicine as “curing”, and “as important” as traditional medicine in its healing properties. All participants report use of hospitals and clinics when they and their families fall ill. Specifically, participants admire biomedicine for its ability to “look within” for “internal” maladies through use of serum testing and radiographs, while traditional approaches cannot. Some describe biomedicine as “complementary” to traditional healing, and themselves “collaborators” with biomedical providers. One participant describes a common process of clients tacking between the two realms:

For the natural ones [biomedical illnesses], I tell the patient to go to hospital. But it is important to say that there are some cases in which the patient had been to the hospital and the disease was not diagnosed. So when they come to me, I remove the evil spirit that was preventing the diagnosis of the disease, and then I send back the patient to the hospital. I also encourage the



1 patient by saying that s/he will get well soon and what s/he needs to do is to follow the hospital  
2 doctor's instructions (Participant 305, Male, 53 years old).

3  
4 The healer in this case describes a context of *medical pluralism*, where both traditional  
5 and biomedical forms of healing are utilized by the client. He is encouraging the client to adhere  
6 to instructions provided by biomedical providers, suggesting that healers do not conceive of  
7 hospital or clinics as competitive entities, nor are they distrustful of their recommendations.  
8 Rather, they offer support and encourage the client's biomedical utilization.

9 *Advocating for their clients:* Participants describe behaviors that facilitate client utilization of  
10 biomedicine, particularly for those presenting with symptoms of Acquired immunodeficiency  
11 syndrome [AIDS]. They report familiarity of symptoms of HIV infection as those related to  
12 AIDS (weight loss, chronic cough, alopecia, diarrhea, chronic skin rashes/wounds); these clients  
13 are immediately referred to the hospital. Our results support the concept that healers are  
14 *advocates* for their clients, and consider themselves to be working in cooperation with  
15 biomedical providers. Advocacy behaviors includes escorting patients to the hospital themselves,  
16 phoning in "referrals" to hospitals, "begging" or otherwise persuading clients to visit the  
17 hospital. Such advocacy is underlain by feelings of "love" and "obligation", and acting in the  
18 best interests of clients, whom they consider "family members". A healer describes her  
19 relationship with one of her clients, who was recently diagnosed as HIV-infected:

20 It still secret [that my client is HIV+]. No one else knows apart from me, even his relatives. So  
21 now I have become his relative, because I am the one who escorts him to the clinics, a thing  
22 which his relatives do not do ... When we were at the hospital, the only thing that the patient was  
23 saying is that he 'preferred to die'. Then I asked, 'how about the two daughters that you have?' I  
24 told him that he is still young and he can live a long life if only he takes care of himself and starts

1 to medicate. It took a lot of effort in order to enroll [in HIV care] at the hospital for him to start  
2 medications, and sure enough, I managed to help him do it. He is medicating and now he shows  
3 some good signs (Participant 301, Female, 49 years old).

4 This participant elaborates on a sense of responsibility in convincing a sick-appearing client to  
5 go to the hospital:

6 He did not welcome the news [of going to the hospital], but since we fight for people's lives, we  
7 need to be bold enough to do so. We cannot mess up with these diseases, especially AIDS ...  
8 Diseases like this one, they need medical attention (Participant 208, Female, 45 years old).

9 Another healer describes his role in the lives of his clients: "The job we have is so important, I  
10 say. Because from the traditional perspective of healing there is a lot that we are able to help a lot  
11 of people with ... We are part of what helps a human being" (Participant 202, Male, 59 years  
12 old).

13 *Clients "run" from biomedicine:* Traditional healers in our sample report that their clients  
14 frequently object to their referrals for biomedical evaluation and testing, and will "run away"  
15 from the healer to avoid this outcome. Healers "know by looking at someone" if the client is  
16 "sick or not"; sick clients warrant urgent referral to hospitals. However, they have learned to  
17 approach these clients "carefully" to avoid causing them to flee:

18 We have learned now. We know how to talk to them, because a person in those conditions [when  
19 clients are sick] is so sensitive. If we do not attend to him here, he will not even get to a hospital  
20 ... I will handle [that client] carefully, because you cannot communicate aggressively to the  
21 patient. If you do so, he will run away ... so, you be tender as you inform him, until he goes to  
22 hospital (Participant 203, Female, 50 years old).

23

1           Our participants attribute client resistance to fear of biomedical testing (for HIV,  
2 specifically). One participant reports, “Many times, people say that when a traditional healer fails  
3 to help you, it means you are dead already” (Participant 202, Male, 59 years old). This saying  
4 underlies the concept that traditional practitioners are trusted and preferred for their capacity to  
5 *heal*, while visits to biomedical facilities may be associated with bad outcomes and death.  
6 Another healer suggests that their clients prefer traditional medicine as a means of avoiding their  
7 medical diagnoses: “When they come here, sometimes they are avoiding going to hospitals, or  
8 they have been there and were diagnosed with HIV and he hides it and come to us, and you ask  
9 him back to hospital – again he runs away” (Participant 204, Female, 66 years old). Healers also  
10 suggest that clients avoid biomedical facilities due to perceived poor quality of services, such as  
11 “long queues” or “defective machines” and the fact that practitioners are “not friendly to patients  
12 in our hospital. I think when one thinks of having his HIV status know by those professionals, I  
13 thinks it scares him” (Participant 213, Female, 35 years old).

14

#### 15 **Discussion:**

16 This qualitative study elucidates experiences of healers practicing in Maputo, Mozambique, an  
17 HIV-endemic region which is also home to the highest density of biomedical resources in the  
18 country (Anjos Luis & Cabral, 2016). Our results demonstrate that Maputo is a medically  
19 pluralistic context with cyclical/concurrent traditional and biomedical use within one’s  
20 therapeutic itinerary. Participants state that clients “run” from biomedical facilities, potentially  
21 due to mistrust of services and providers, and preference for culturally competent traditional  
22 healing. Despite low opinions and avoidance by clients, our healer participants report high regard  
23 for biomedicine. They consider themselves as collaborators with biomedical providers, and

1 advocate for clients to escalate care, often facing resistance from clients whom they refer to the  
2 hospital. This provides a unique, holistic arrangement where biomedical and traditional  
3 approaches to healing are accepted and encouraged.

4         Our research demonstrates that traditional healers function in their communities as client  
5 advocates. Advocacy efforts are based on their sense of obligation to clients, whom they consider  
6 to be close, like family members. Healers develop strategies to overcome client resistance to HIV  
7 testing, by approaching them in a “tender” manner, through developing rapport, and providing  
8 reassurance and support. Further, our results describe an important factor contributing to low  
9 rates of HIV testing in Mozambique: client reticence for biomedical testing. This describes a  
10 bottleneck in the cascade of HIV care. If HIV-infected patients are not identified through  
11 voluntary testing, they cannot be enrolled into care. This is particularly problematic because  
12 early diagnosis and initiation of ART therapy is crucial to preventing transmission and  
13 optimizing health outcomes (The INSIGHT START Study Group, 2015). Our results also speak  
14 to the phenomenon of the widening gender gap in life expectancy among HIV-infected  
15 populations in sub-Saharan Africa, where men have two-fold higher mortality rates than women  
16 (Bor et al., 2015). These ‘missing men’ (Tsai & Siedner, 2015) may be clients who “run away”  
17 from hospitals and biomedical facilities. Efforts to improve engagement with male populations in  
18 HIV endemic regions should therefore consider those who visit healers, and how collaborative  
19 efforts may overcome reticence toward engagement with HIV services. This holistic approach to  
20 client health explains why healers maintain positions of authority in their communities. This is  
21 no less important in the urban, capital city than it is for clients living a rural district with no local  
22 hospital.

1           Based on our results, we suggest that traditional healers could be considered one of the  
2 “critical enablers” (UNAIDS, 2012) of effective responses to the AIDS epidemic in  
3 Mozambique, if not throughout much of sub-Saharan Africa where they practice. Critical  
4 enablers are stakeholders who can “overcome major barriers to [HIV] service uptake, including  
5 social exclusion, marginalization, criminalization, stigma and inequity. Critical enablers are  
6 crucial to the success of HIV programs in all epidemic contexts” (UNAIDS, 2012). Our results,  
7 and others, indicate that healers are preferred providers due positions of respect and trust in their  
8 communities (Green, 1992), their ability to provide holistic and culturally-appropriate care  
9 (O'Brien & Broom, 2014; Taylor, Dolezal, Tross, & Holmes, 2008), and are relied upon in  
10 regions that lack available biomedical resources (Morris, 2001).

11           Traditional healers possess *social capital*, amassed through their engagement in  
12 “networks of social acquaintance and recognition” (Bourdieu, 1986). These networks of  
13 interactions and prestige also generate *symbolic capital*, where “power is granted to those who  
14 have obtained sufficient recognition to be in a position to impose recognition” (Bourdieu, 1989).  
15 Our data demonstrate how healers mobilize their social and symbolic capital to benefit clients  
16 through their advocacy – facilitating access to healthcare resources, and encouraging clients to  
17 undergo HIV testing – through a cooperative approach to healing. As such, healers are  
18 gatekeepers to communities with poor biomedical engagement. National and international  
19 responses to ending the HIV epidemic by 2030 (UNAIDS, 2014b) must consider the impact of  
20 these practitioners within their communities. Our data, like others from varying contexts (Audet,  
21 Hamilton, Hughart, & Salato, 2015; Homsy et al., 2004; King & Homsy, 1997), demonstrate  
22 cooperative approaches to caring for clients, suggesting that healers are willing to work in  
23 collaboration with biomedical providers, researchers, and public health officials.

1 **Limitations:** We recognize some limitations of our study. First, qualitative data are not intended  
2 to be largely generalizable; rather, they provide detailed and highly contextual information about  
3 a population of interest. As such, we acknowledge that our qualitative findings may be specific  
4 to a population of traditional healers practicing in a relatively well-serviced city (Maputo,  
5 Mozambique). We do, however, note some similarities with studies with healers in more remote  
6 area of sub-Saharan Africa, particularly insofar as we describe positive attitudes towards  
7 biomedicine and willingness to collaborate with biomedical providers. Second, we did not amass  
8 evidence to support the notion that biomedical providers reciprocate the cooperative spirit  
9 described by study participants.

#### 10 **Conclusions:**

11 Our data include findings which can inform efforts to meet the Joint United Nations Programme  
12 on HIV/AIDS 90-90-90 benchmarks to end the epidemic (UNAIDS, 2014b). We present three  
13 important themes relevant to the roles of traditional healers in HIV-endemic regions: 1) positive  
14 attitudes towards biomedicine that underlies cooperative healing for their clients; 2) advocacy for  
15 clients; and 3) client reticence for biomedical testing. Healers practicing in these regions could  
16 be considered *critical enablers* to effective HIV programs. Their social and symbolic capital  
17 positions them to beneficially influence clients. They are natural partners to improve uptake of  
18 HIV services in communities with poor biomedical engagement.

19 Word Count: 3408

20 Acknowledgements: The authors are grateful to Ms. Olga Tomas, AMETRAMO President, for her  
21 support and assistance with member participant recruitment. We are also grateful to our Research  
22 Assistants for their hard work carrying out the data collection: Felício Almeida, Alberto Manhuja,  
23 Andreia da Silva, Delfinada Silva. We also wish to extend our sincere gratitude to the Traditional Healers  
24 who participated in our research, and for sharing their experiences and insights with us.

1 Authors' contributions: RS conceived and designed the study, primarily conducted data analysis, and  
2 drafted the manuscript. PVL and SM contributed to study design, oversaw data acquisition, contributed  
3 towards data analysis, revised the manuscript for critically important intellectual content. TM oversaw  
4 data acquisition and revised the manuscript for critically important intellectual content. All authors  
5 approve of the version of the manuscript for submission.

6 Disclosure Statement: The authors declare that they have no competing interests to disclose.

7 Funding: This work was supported by the University of California, San Diego (UCSD), Center for AIDS  
8 Research (CFAR) Developmental Grant (PI: R Sundararajan), under grant P30 AI036214 (which is  
9 supported by the following NIH Institutes and Centers: NIAID, NCI, NIMH, NIDA, NICHD, NHLBI,  
10 NIA, NIGMS, and NIDDK), the UCSD Academic Senate and the UCSD Global Health Institute. RS is  
11 supported by the National Institute of Mental Health (K23MH11409). The funders had no role in the  
12 study design, data collection, analysis of data, or writing of this manuscript.

13

#### 14 REFERENCES

- 15 Anjos Luis, dos, A., & Cabral, P. (2016). Geographic accessibility to primary healthcare centers  
16 in Mozambique. *International Journal for Equity in Health*, 1–13.  
17 <http://doi.org/10.1186/s12939-016-0455-0>
- 18 Audet, C. M., Blevins, M., Rosenberg, C., Farnsworth, S., Salato, J., Fernandez, J., & Vermund,  
19 S. H. (2014). Symptomatic HIV-Positive Persons in Rural Mozambique Who First Consult a  
20 Traditional Healer Have Delays in HIV Testing : A Cross-Sectional Study. *Journal of*  
21 *Acquired Immune Deficiency Syndrome*, 66(4), 80–86.
- 22 Audet, C. M., Hamilton, E., Hughart, L., & Salato, J. (2015). Engagement of Traditional Healers  
23 and Birth Attendants as a Controversial Proposal to Extend the HIV Health Workforce.  
24 *Current HIV/AIDS Reports*, 12(2), 238–245. <http://doi.org/10.1007/s11904-015-0258-8>
- 25 Bor, J., Rosen, S., Chimbindi, N., Haber, N., Herbst, K., Mutevedzi, T., et al. (2015). Mass HIV  
26 Treatment and Sex Disparities in Life Expectancy: Demographic Surveillance in Rural South  
27 Africa. *PLoS Medicine*, 12(11), e1001905. <http://doi.org/10.1371/journal.pmed.1001905>
- 28 Bourdieu, P. (1986). The forms of capital. In J. G. Richardson (Ed.), *Handbook of theory and*  
29 *research for the sociology of education* (pp. 241–258). New York.
- 30 Bourdieu, P. (1989). Social Space and Symbolic Power. *Sociological Theory*, 7(1), 14.  
31 <http://doi.org/10.2307/202060>

- 1 Corbin, J., & Strauss, A. (2014). Basics of Qualitative Research: Techniques and procedures for  
2 developing grounded theory (4 ed.). Newbury Park: Sage Publications.
- 3 Global Health Workers Alliance. (2013). MLHW Case Studies: Mozambique. In *Mid-level*  
4 *Health Workers for Delivery of Essential Health Services* (pp. 1–20).
- 5 Green, E. C. (1992). Sexually transmitted disease, ethnomedicine and health policy in Africa.  
6 *Social Science & Medicine*, 35(2), 121–130. [http://doi.org/10.1016/0277-9536\(92\)90159-N](http://doi.org/10.1016/0277-9536(92)90159-N)
- 7 Green, E. C. (1999). Engaging Indigenous African Healers in the Prevention of AIDS and STDs.  
8 In *Anthropology in Public Health* (pp. 63–83). Oxford University Press, USA.
- 9 Green, E. C., Zokwe, B., & Dupree, J. D. (1995). The experience of an AIDS prevention  
10 program focused on South African traditional healers. *Social Science & Medicine* (1982),  
11 40(4), 503–515.
- 12 Health, M. M. O. (2010, October 14). National Survey on Prevalence, Behavioral Risks and  
13 Information about HIV and AIDS (INSIDA). Retrieved February 2, 2017, from
- 14 Homsy, J., King, R., Balaba, D., & Kabatesi, D. (2004). Traditional health practitioners are key  
15 to scaling up comprehensive care for HIV/AIDS in sub-Saharan Africa. *Aids*, 18(12), 1723–  
16 1725. <http://doi.org/10.1097/01.aids.0000131380.30479.16>
- 17 Hughes, G. D., Puoane, T. R., Clark, B. L., Wondwossen, T. L., Johnson, Q., & Folk, W. (2012).  
18 Prevalence and Predictors of Traditional Medicine Utilization among Persons Living With  
19 AIDS (PLWA) on Antiretroviral (ARV) and Prophylaxis Treatment in both Rural and Urban  
20 Areas in South Africa. *African Journal of Traditional, Complementary, and Alternative*  
21 *Medicines : AJTCAM*, 9(4), 470–484. <http://doi.org/10.4314/ajtcam.v9i4.4>
- 22 King, R., & Homsy, J. (1997). Involving traditional healers in AIDS education and counselling  
23 in sub-Saharan Africa: a review. *Aids*, 11 Suppl A, S217–25.
- 24 Morris, K. (2001). Treating HIV in South Africa—a tale of two systems. *The Lancet*, 357(9263),  
25 1190. [http://doi.org/10.1016/S0140-6736\(00\)04401-9](http://doi.org/10.1016/S0140-6736(00)04401-9)
- 26 Moshabela, M., Pronyk, P., Williams, N., Schneider, H., & Lurie, M. (2011). Patterns and  
27 implications of medical pluralism among HIV/AIDS patients in rural South Africa. *AIDS*  
28 *and Behavior*, 15(4), 842–852. <http://doi.org/10.1007/s10461-010-9747-3>
- 29 O'Brien, S., & Broom, A. (2014). HIV in (and out of) the clinic: Biomedicine, traditional  
30 medicine and spiritual healing in Harare. *SAHARA-J: Journal of Social Aspects of*  
31 *HIV/AIDS*, 11(1), 94–104. <http://doi.org/10.1080/17290376.2014.938102>



- 1 Palinkas, L. A., Horwitz, S. M., Green, C. A., Wisdom, J. P., Duan, N., & Hoagwood, K. (2015).  
2 Purposeful Sampling for Qualitative Data Collection and Analysis in Mixed Method  
3 Implementation Research. *Administration and Policy in Mental Health and Mental Health  
4 Services Research*, 42(5), 533–544. <http://doi.org/10.1007/s10488-013-0528-y>
- 5 PEPFAR. (n.d.). PEPFAR: Maputo City. Retrieved September 22, 2016, from  
6 [photos.state.gov/libraries/mozambique/328671/pepfar-provincial/  
7 profile-12612.pdf](http://photos.state.gov/libraries/mozambique/328671/pepfar-provincial/maputo-city-provincial-profile-12612.pdf)
- 8 Sundararajan, R., Kalkonde, Y., Gokhale, C., Greenough, P. G., & Bang, A. (2013). Barriers to  
9 malaria control among marginalized tribal communities: a qualitative study. *PLoS ONE*,  
10 8(12), e81966. <http://doi.org/10.1371/journal.pone.0081966>
- 11 Taylor, T. N., Dolezal, C., Tross, S., & Holmes, W. C. (2008). Comparison of HIV/AIDS-  
12 specific quality of life change in Zimbabwean patients at western medicine versus traditional  
13 African medicine care sites. *JAIDS Journal of Acquired Immune Deficiency Syndromes*,  
14 49(5), 552–556. <http://doi.org/10.1097/QAI.0b013e31818d5be0>
- 15 The INSIGHT START Study Group. (2015). Initiation of Antiretroviral Therapy in Early  
16 Asymptomatic HIV Infection. *New England Journal of Medicine*, 373(9), 795–807.  
17 <http://doi.org/10.1056/NEJMoa1506816>
- 18 Tsai, A. C., & Siedner, M. J. (2015). The Missing Men: HIV Treatment Scale-Up and Life  
19 Expectancy in Sub-Saharan Africa. *PLoS Medicine*, 12(11), e1001906.  
20 <http://doi.org/10.1371/journal.pmed.1001906>
- 21 UNAIDS. (2012, December 3). Understanding and acting on critical enablers and development  
22 synergies for strategic investments. Retrieved January 30, 2017, from
- 23 UNAIDS. (2014a, September 9). The Gap Report. Retrieved December 30, 2015, from
- 24 UNAIDS. (2014b, October 6). 90-90-90: An ambitious treatment target to help end the AIDS  
25 epidemic. Retrieved December 30, 2015, from  
26 [http://www.unaids.org/sites/default/files/media\\_asset/90-90-90\\_en\\_0.pdf](http://www.unaids.org/sites/default/files/media_asset/90-90-90_en_0.pdf)
- 27 Wanyama, J. N., Tsui, S., Kwok, C., Wanyenze, R. K., Denison, J. A., Koole, O., et al. (2017).  
28 Persons living with HIV infection on antiretroviral therapy also consulting traditional  
29 healers: a study in three African countries. *International Journal of STD & AIDS*, 28(10),  
30 1018–1027. <http://doi.org/10.1177/0956462416685890>

- 1 World Health Organization. (2006). Country Health System Fact Sheet 2006: Mozambique.
- 2 *World Health Statistics*. Retrieved from <http://www.who.int/whosis/en/>
- 3 World Health Organization. (2002, February 26). WHO Traditional Medicine Strategy 2002–
- 4 2005. Retrieved December 30, 2015, from
- 5 <http://apps.who.int/medicinedocs/pdf/s2297e/s2297e.pdf>

6  
7  
8  
9  
10  
11  
12  
13  
14  
15  
16  
17  
18  
19  
20  
21  
22  
23  
24  
25

1  
2  
3  
4  
5  
6  
7  
8  
9

| <b>Participant Characteristic</b>  | <b>Value</b>                  | <b>Standard Deviation</b> |
|------------------------------------|-------------------------------|---------------------------|
| Age (in years)                     | 48 (mean)                     | 12.2                      |
| Gender                             | 67% Female (N=24)             | n/a                       |
| AMETRAMO members                   | 42% (N=15)                    | n/a                       |
| Highest level of education (grade) | Grade 4.5 (median)            | 9.0 (IQR)                 |
| Weekly income (in USD)             | \$33.41 (mean)                | \$17.41                   |
| Weekly client volume (in persons)  | 4.6 (mean)                    | 2.2                       |
| KQ-18 HIV knowledge score          | 11.2 (mean; 18 maximum score) | 3.4                       |

10 *Table Caption:* Table 1. Characteristics of study participants (N=36)

11  
12  
13  
14  
15
